# Supplementary material for: Ultra-processed food consumption, mediating biomarkers, and risk of chronic obstructive pulmonary disease: a prospective cohort study in the UK Biobank
Source: Royal Society of Chemistry journal article supplement (doi:10.1039/d3fo02069j), 2023-01-01
Supplement: d3fo02069j1.pdf [file d3fo02069j1.pdf]

## Supplementary Method

### NOVA system classification

Overall, four categories were established per the NOVA classification system as follows: 1) **UNPFs**, such as fruits, vegetables, milk, and meat; 2) **processed culinary ingredients** comprising vegetable oils obtained by crushing seeds, nuts, and fruits; 3) **processed foods**, such as canned or bottled vegetables and legumes in brine; and 4) **UPFs**, including soft drinks, packaged snacks, confectionery, breakfast cereals, flavored yogurts, industrially processed bread and buns, and processed meat products [1].

### Covariate classification

Individual sociodemographic and behavioral covariates were collected through a questionnaire at baseline, including age, sex, ethnicity (White, others), body mass index ( $<18.5\text{kg}\cdot\text{m}^2$ ,  $18.5\text{--}25\text{kg}\cdot\text{m}^2$ ,  $25\text{--}30\text{kg}\cdot\text{m}^2$ ,  $\geq 30\text{kg}\cdot\text{m}^2$ ), total energy intake, highest qualification (none, O levels or General Certificate of Secondary Education or Certificate of Secondary Education or equivalent, A levels/AS levels or equivalent, National Vocational Qualification or Higher National Diploma or Higher National Certificate or other professional, College or University degree), annual before-tax household income ( $<\text{GBP } 31\,000$ ,  $\geq\text{GBP } 31\,000$ ), smoking status (never smokers, current or past occasional smokers, pack years  $<10$ , pack years  $10\text{--}19$ , pack years  $\geq 20$ ), passive smoking exposure (none, any) and family history of chronic lung disease. Physical activity was expressed as total Metabolic Equivalent Task (MET) hours per week for all activities including walking, moderate and vigorous activity. MET score: low ( $< 600$  MET-min/week), moderate (600 to 3000 MET-min/week), and high ( $\geq 3000$  MET-min/week) [2]. Townsend deprivation

index (TDI) combined information on social class, employment, car availability, and housing. Higher scores represent higher levels of area-based socioeconomic deprivation [3]. The healthy diet score was adopted from previously published studies by estimating adherence to the main items of the Mediterranean diet, which was calculated in reference to the following elements: vegetables, fruits, fish, unprocessed red meat, and processed meat [4-6]. Healthy diet score is calculated based on the following factors: vegetable intake of at least four tablespoons each day; fruit intake of at least three pieces each day; fish intake of at least twice each week; unprocessed red meat intake of no more than twice each week; and processed meat intake of no more than twice each week. One point was given for each favorable dietary factor and the total diet score ranged from 0 to 5. A higher score indicates a much healthier diet.

## Reference

1. Gu Y, Li H, Ma H, Zhang S, Meng G, Zhang Q, et al. Consumption of ultraprocessed food and development of chronic kidney disease: the Tianjin Chronic Low-Grade Systemic Inflammation and Health and UK Biobank Cohort Studies. *Am J Clin Nutr.* 2023;117(2):373-82. Epub 20221216. doi: 10.1016/j.ajcnut.2022.11.005. PubMed PMID: 36811571.
2. Chen L, Cai M, Li H, Wang X, Tian F, Wu Y, et al. Risk/benefit tradeoff of habitual physical activity and air pollution on chronic pulmonary obstructive disease: findings from a large prospective cohort study. *BMC Med.* 2022;20(1):70. Epub 20220228. doi: 10.1186/s12916-022-02274-8. PubMed PMID: 35220974; PubMed Central PMCID: PMCPCMC8883705.
3. Tan CH, Tan JJX. Low neighborhood deprivation buffers against hippocampal neurodegeneration, white matter hyperintensities, and poorer cognition. *Geroscience.* 2023. Epub 20230401. doi: 10.1007/s11357-023-00780-y. PubMed PMID: 37004594.
4. Wang M, Zhou T, Li X, Ma H, Liang Z, Fonseca VA, et al. Baseline Vitamin D Status, Sleep Patterns, and the Risk of Incident Type 2 Diabetes in Data From the UK Biobank Study. *Diabetes Care.* 2020;43(11):2776-84. Epub 2020/08/28. doi: 10.2337/dc20-1109. PubMed PMID: 32847829; PubMed Central PMCID: PMCPCMC7576418.
5. Zhang T, Xu X, Chang Q, Lv Y, Zhao Y, Niu K, et al. Ultra-processed food consumption, genetic predisposition, and the risk of gout: the

UK Biobank study. *Rheumatology (Oxford)*. 2023. Epub 2023/05/02. doi: 10.1093/rheumatology/kead196. PubMed PMID: 37129545.

6. Pazoki R, Dehghan A, Evangelou E, Warren H, Gao H, Caulfield M, et al. Genetic Predisposition to High Blood Pressure and Lifestyle Factors: Associations With Midlife Blood Pressure Levels and Cardiovascular Events. *Circulation*. 2018;137(7):653-61. Epub 2017/12/20. doi: 10.1161/CIRCULATIONAHA.117.030898. PubMed PMID: 29254930.

**Table S1.** UPF items in the UK Biobank

| <b>Data field</b> | <b>Food item</b>                                            | <b>Portion size (g/serving)</b> | <b>Energy (KJ/100 g)</b> | <b>Energy for one serving (KJ/serving)</b> |
|-------------------|-------------------------------------------------------------|---------------------------------|--------------------------|--------------------------------------------|
| 100160            | Low calorie drink intake                                    | 330                             | 43                       | 141.90                                     |
| 100170            | Fizzy drink intake carbonated (fizzy) drinks                | 330                             | 174                      | 574.20                                     |
| 100180            | Squash intake                                               | 250                             | 159                      | 397.50                                     |
| 100250            | Instant coffee intake                                       | 190                             | 8                        | 15.20                                      |
| 100380            | Intake of artificial sweetener added to coffee <sup>c</sup> | 6                               | 200                      | 12.00                                      |
| 100500            | Intake of artificial sweetener added to tea <sup>d</sup>    | 6                               | 200                      | 12.00                                      |
| 100530            | Flavoured milk intake                                       | 250                             | 270                      | 675.00                                     |
| 100720            | Fortified wine intake                                       | 50                              | 481                      | 240.50                                     |
| 100730            | Spirits intake                                              | 23                              | 919                      | 211.37                                     |
| 100770            | Porridge intake                                             | 203.5                           | 195                      | 396.83                                     |
| 100800            | muesli intake                                               | 100                             | 1540                     | 1540.00                                    |
| 100810            | Oat crunch intake                                           | 100                             | 1639                     | 1639.00                                    |
| 100820            | Sweetened cereal intake                                     | 38                              | 1632                     | 620.16                                     |
| 100830            | Plain cereal intake                                         | 30                              | 1601                     | 480.30                                     |
| 100840            | Bran cereal intake                                          | 50                              | 1406                     | 703.00                                     |
| 100850            | Whole-wheat cereal intake                                   | 44                              | 1474                     | 648.56                                     |
| 100860            | Other cereal intake                                         | 44                              | 1566                     | 689.04                                     |
| 101090            | Bap intake                                                  | 90                              | 1065                     | 958.50                                     |
| 101160            | Bread roll intake                                           | 60                              | 1084                     | 650.40                                     |
| 101230            | Naan bread intake                                           | 160                             | 1206                     | 1929.60                                    |
| 101250            | Crispbread intake                                           | 10                              | 1591                     | 159.10                                     |
| 101260            | Oatcakes intake                                             | 13                              | 1737                     | 225.81                                     |
| 101270            | Other bread intake                                          | 45                              | 1661                     | 747.45                                     |
| 101310            | Number of bread slices with butter/margarine                | Thin 10/<br>Medium 12/          | 3061                     | 306.10/367.32/459.15                       |

|        |                                                      |          |      |                      |
|--------|------------------------------------------------------|----------|------|----------------------|
| 101350 | Number of baguettes with butter/margarine            | Thick 15 |      | 306.10/367.32/459.15 |
| 101390 | Number of baps with butter/margarine                 |          |      | 306.10/367.32/459.15 |
| 101430 | Number of bread rolls with butter/margarine          |          |      | 306.10/367.32/459.15 |
| 101470 | Number of crackers/crispbreads with butter/margarine |          |      | 306.10/367.32/459.15 |
| 101510 | Number of oatcakes with butter/margarine             |          |      | 306.10/367.32/459.15 |
| 101550 | Number of other bread types with butter/margarine    |          |      | 306.10/367.32/459.15 |
| 101970 | Double crust pastry intake                           | 60       | 1060 | 636.00               |
| 101980 | Single crust pastry intake                           | 30       | 1310 | 393.00               |
| 101990 | Crumble intake                                       | 70       | 924  | 646.80               |
| 102000 | Pizza intake                                         | 150      | 1036 | 1554.00              |
| 102010 | Pancake intake                                       | 110      | 1065 | 1171.50              |
| 102020 | Scotch pancake intake                                | 41       | 1138 | 466.58               |
| 102030 | Yorkshire pudding intake                             | 25       | 881  | 220.25               |
| 102040 | Indian snacks intake                                 | 40       | 975  | 390.00               |
| 102050 | Croissant intake                                     | 60       | 1563 | 937.80               |
| 102060 | Danish pastry intake                                 | 110      | 1441 | 1585.10              |
| 102070 | Scone intake                                         | 48       | 1378 | 661.44               |
| 102120 | Ice-cream intake                                     | 120      | 1229 | 1474.80              |
| 102140 | Milk-based pudding intake                            | 200      | 494  | 988.00               |
| 102150 | Other milk-based pudding intake                      | 60       | 518  | 310.80               |
| 102170 | Soya dessert intake                                  | 125      | 309  | 386.25               |
| 102180 | Fruitcake intake                                     | 70       | 1478 | 1034.60              |
| 102190 | Cake intake                                          | 60       | 1617 | 970.20               |
| 102200 | Doughnut intake                                      | 60       | 1414 | 848.40               |
| 102210 | Sponge pudding intake                                | 120      | 1116 | 1339.20              |
| 102220 | Cheesecake intake                                    | 110      | 1231 | 1354.10              |
| 102230 | Other dessert intake                                 | 60       | 696  | 417.60               |
| 102260 | Chocolate bar intake                                 | 50       | 2081 | 1040.50              |

|        |                                                                                       |     |      |         |
|--------|---------------------------------------------------------------------------------------|-----|------|---------|
| 102270 | White chocolate intake                                                                | 50  | 2212 | 1106.00 |
| 102280 | Milk chocolate intake                                                                 | 50  | 2177 | 1088.50 |
| 102290 | Dark chocolate intake                                                                 | 50  | 2273 | 1136.50 |
| 102300 | Chocolate-covered raisin intake                                                       | 25  | 1159 | 289.75  |
| 102310 | Chocolate sweet intake                                                                | 36  | 1922 | 691.92  |
| 102320 | Diet sweets intake                                                                    | 18  | 975  | 175.50  |
| 102330 | Sweets intake                                                                         | 36  | 1793 | 645.48  |
| 102340 | Chocolate-covered biscuits intake                                                     | 17  | 2076 | 352.92  |
| 102350 | Chocolate biscuits intake                                                             | 24  | 2071 | 497.04  |
| 102360 | Sweet biscuits intake                                                                 | 17  | 1842 | 313.14  |
| 102370 | Cereal bar intake                                                                     | 28  | 1525 | 427.00  |
| 102380 | Other sweets intake sweet snacks                                                      | 40  | 1793 | 717.20  |
| 102460 | Crisp intake                                                                          | 40  | 2186 | 874.40  |
| 102470 | Savoury biscuits intake                                                               | 40  | 2168 | 867.20  |
| 102480 | Cheesy biscuits intake                                                                | 40  | 1366 | 546.40  |
| 102500 | Other savoury snack intake                                                            | 40  | 2099 | 839.60  |
| 102530 | Powdered/instant soup intake                                                          | 200 | 270  | 540.00  |
| 102760 | Snackpot intake (snack pot, noodles/rice)                                             | 280 | 1541 | 4314.80 |
| 102770 | Couscous intake                                                                       | 150 | 1440 | 2160.00 |
| 102850 | Low fat cheese spread intake                                                          | 40  | 733  | 293.20  |
| 102860 | Cheese spread intake                                                                  | 15  | 1106 | 165.90  |
| 103010 | Sausage intake                                                                        | 30  | 1218 | 365.40  |
| 103050 | Crumbed or deep-fried poultry intake (chicken or turkey in breadcrumbs or deep fried) | 100 | 1111 | 1111.00 |
| 103070 | Bacon intake                                                                          | 46  | 891  | 409.86  |
| 103080 | Ham intake                                                                            | 23  | 891  | 204.93  |
| 103260 | Vegetarian sausages/burgers intake                                                    | 90  | 748  | 673.20  |
| 103280 | Quorn intake                                                                          | 90  | 389  | 350.10  |
| 103290 | Other vegetarian alternative intake                                                   | 90  | 1386 | 1247.40 |

|        |                       |     |     |         |
|--------|-----------------------|-----|-----|---------|
| 104000 | Baked bean intake     | 135 | 335 | 452.25  |
| 104020 | Fried potatoes intake | 180 | 796 | 1432.80 |
| 104050 | Mashed potato intake  | 60  | 438 | 262.8   |

---

Abbreviations: UPF, ultra-processed food.

**Table S2.** Definition of COPD Diagnosis

| <b>Code type</b>                   | <b>Codes</b>                                                                                                                                                                                                     |
|------------------------------------|------------------------------------------------------------------------------------------------------------------------------------------------------------------------------------------------------------------|
| UK Biobank Self Report information | Field ID 20002 (1112, 1113, 1472)                                                                                                                                                                                |
| ICD-9 information                  | 492, 492.0, 492.8, 492.9, 496.X                                                                                                                                                                                  |
| ICD-10 information                 | J43, J43.0, J43.1, J43.2, J43.8, J43.9, J44, J44.0, J44.1, J44.8, J44.9                                                                                                                                          |
| Read V2 information                | 663K., 66YB., 66YD., 66Yg., 66Yh., 66YL., 66YM., 66YS., 66YT., 679V., 8CR1., 9Oi., 9Oi0., 9Oi1., 9Oi2., 9Oi3., 9Oi4., H3..., H3121, H312z, H32., H320., H320z, H322., H32z., H36., H37., H38., H39., H3y., H3z.. |

Abbreviations: COPD, chronic obstructive pulmonary disease.



**Table S3.** Multivariable-adjusted linear regression models for the association between UPF consumption and biomarker levels <sup>a</sup>.

| Biomarkers                                | UPF consumption |              |              |         |         |              |              |         |
|-------------------------------------------|-----------------|--------------|--------------|---------|---------|--------------|--------------|---------|
|                                           | Model 1         |              |              |         | Model 2 |              |              |         |
|                                           | $\beta$         | Lower 95% CI | Upper 95% CI | P-value | $\beta$ | Lower 95% CI | Upper 95% CI | P-value |
| <b>Glycemic control</b>                   |                 |              |              |         |         |              |              |         |
| HbA1c (mmol/mol)                          | 0.055           | 0.0506       | 0.0593       | <0.0001 | 0.0309  | 0.0266       | 0.0352       | <0.0001 |
| <b>Inflammation</b>                       |                 |              |              |         |         |              |              |         |
| C-reactive protein (mmol/L)               | 0.7198          | 0.6882       | 0.7514       | <0.0001 | 0.1829  | 0.1529       | 0.213        | <0.0001 |
| Erythrocyte distribution width (%)        | 0.0148          | 0.0129       | 0.0168       | <0.0001 | 0.0117  | 0.0096       | 0.0137       | <0.0001 |
| Leukocyte count (10 <sup>9</sup> cells/L) | 0.1372          | 0.1296       | 0.1447       | <0.0001 | 0.0529  | 0.0451       | 0.0606       | <0.0001 |
| NLR                                       | 0.0932          | 0.0809       | 0.1056       | <0.0001 | 0.0372  | 0.0243       | 0.0501       | <0.0001 |
| PLR                                       | -0.0531         | -0.0641      | -0.042       | <0.0001 | -0.0153 | -0.0268      | -0.0039      | 0.0088  |
| SII                                       | 0.1147          | 0.1002       | 0.1293       | <0.0001 | 0.0521  | 0.0369       | 0.0673       | <0.0001 |
| <b>Lipid profile</b>                      |                 |              |              |         |         |              |              |         |
| Apolipoprotein A (g/L)                    | -0.1619         | -0.1671      | -0.1567      | <0.0001 | -0.0908 | -0.0958      | -0.0858      | <0.0001 |
| Apolipoprotein B (g/L)                    | 0.0142          | 0.0072       | 0.0212       | 0.0001  | -0.0076 | -0.0149      | -0.0003      | 0.0412  |
| Total cholesterol (mmol/L)                | -0.0589         | -0.0649      | -0.0528      | <0.0001 | -0.0401 | -0.0464      | -0.0339      | <0.0001 |
| HDL-C (mmol/L)                            | -0.2748         | -0.2823      | -0.2672      | <0.0001 | -0.1345 | -0.1414      | -0.1276      | <0.0001 |
| LDL-C (mmol/L)                            | -0.0096         | -0.017       | -0.0021      | 0.0119  | -0.0125 | -0.0202      | -0.0047      | 0.0017  |
| Triglycerides (mmol/L)                    | 0.3315          | 0.3161       | 0.347        | <0.0001 | 0.0682  | 0.0534       | 0.083        | <0.0001 |

Abbreviations: UPF, ultra-processed food; HR, hazard ratio; CI, confidence interval; HbA1c, glycated hemoglobin; NLR, neutrophil-to-lymphocyte ratio; PLR, platelet-to-lymphocyte ratio; SII, systemic immune-inflammation index; HDL-C, high-density lipoprotein cholesterol; LDL-C, low-density lipoprotein cholesterol.

Model 1 unadjusted.

Model 2 adjusted for age, sex, ethnicity, Townsend deprivation index, education levels, income, BMI, physical activity, total energy intake, healthy diet score, smoking status, passive smoking exposure, and family history of chronic lung diseases.

<sup>a</sup> The multivariable-adjusted linear regression models were used to explore the association between UPF consumption and the biomarkers.

The levels of biomarkers were nature log-transformed before analyses.

**Table S4.** Risk estimates of COPD with the selected biomarkers (1-SD increment) <sup>a</sup>

| Biomarkers                                | COPD             |                 |                  |                 |                  |                 |
|-------------------------------------------|------------------|-----------------|------------------|-----------------|------------------|-----------------|
|                                           | Model 1          |                 | Model 2          |                 | Model 3          |                 |
|                                           | HR (95% CI)      | <i>P</i> -value | HR (95% CI)      | <i>P</i> -value | HR (95% CI)      | <i>P</i> -value |
| <b>Glycemic control</b>                   |                  |                 |                  |                 |                  |                 |
| HbA1c (mmol/mol)                          | 1.37 (1.34-1.4)  | <0.0001         | 1.35 (1.33-1.38) | <0.0001         | 1.14 (1.11-1.16) | <0.0001         |
| <b>Inflammation</b>                       |                  |                 |                  |                 |                  |                 |
| C-reactive protein (mmol/L)               | 1.56 (1.52-1.61) | <0.0001         | 1.54 (1.5-1.58)  | <0.0001         | 1.32 (1.28-1.36) | <0.0001         |
| Erythrocyte distribution width (%)        | 1.24 (1.22-1.27) | <0.0001         | 1.24 (1.21-1.26) | <0.0001         | 1.20 (1.17-1.23) | <0.0001         |
| Leukocyte count (10 <sup>9</sup> cells/L) | 1.55 (1.51-1.58) | <0.0001         | 1.53 (1.5-1.56)  | <0.0001         | 1.35 (1.32-1.39) | <0.0001         |
| NLR                                       | 1.21 (1.18-1.25) | <0.0001         | 1.21 (1.17-1.24) | <0.0001         | 1.14 (1.11-1.18) | <0.0001         |
| PLR                                       | 0.84 (0.81-0.86) | <0.0001         | 0.84 (0.82-0.86) | <0.0001         | 0.95 (0.92-0.97) | 0.0001          |
| SII                                       | 1.18 (1.15-1.22) | <0.0001         | 1.17 (1.14-1.21) | <0.0001         | 1.15(1.12-1.18)  | <0.0001         |
| <b>Lipid profile</b>                      |                  |                 |                  |                 |                  |                 |
| Apolipoprotein A (g/L)                    | 0.87 (0.85-0.9)  | <0.0001         | 0.9 (0.87-0.93)  | <0.0001         | 0.95 (0.92-0.98) | 0.0005          |
| Apolipoprotein B (g/L)                    | 0.9 (0.87-0.92)  | <0.0001         | 0.89 (0.87-0.92) | <0.0001         | 0.90 (0.88-0.93) | <0.0001         |
| Total cholesterol (mmol/L)                | 0.79 (0.77-0.82) | <0.0001         | 0.8 (0.78-0.83)  | <0.0001         | 0.87 (0.85-0.89) | <0.0001         |
| HDL-C (mmol/L)                            | 0.8 (0.77-0.82)  | <0.0001         | 0.82 (0.8-0.85)  | <0.0001         | 0.93 (0.90-0.96) | <0.0001         |
| LDL-C (mmol/L)                            | 0.81 (0.79-0.83) | <0.0001         | 0.81 (0.79-0.83) | <0.0001         | 0.87 (0.85-0.90) | <0.0001         |
| Triglycerides (mmol/L)                    | 1.23 (1.19-1.26) | <0.0001         | 1.2 (1.17-1.24)  | <0.0001         | 0.98 (0.95-1.02) | 0.3298          |

Abbreviations: UPF, ultra-processed food; HR, hazard ratio; CI, confidence interval; COPD, chronic obstructive pulmonary disease; HbA1c, glycated hemoglobin; NLR, neutrophil-to-lymphocyte ratio; PLR, platelet-to-lymphocyte ratio; SII, systemic immune-inflammation index; HDL-C, high-density lipoprotein cholesterol; LDL-C, low-density lipoprotein cholesterol.

Model 1 unadjusted.

Model 2 adjusted for UPF consumption.

Model 3 adjusted for age, sex, ethnicity, Townsend deprivation index, education levels, income, BMI, physical activity, total energy intake, healthy diet score, smoking status, passive smoking exposure, family history of chronic lung diseases, and UPF consumption.

<sup>a</sup> HRs (95% CIs) and *P*-values were obtained by using the multivariable Cox regression model.

The levels of biomarkers were nature log-transformed before analyses.

**Table S5.** Sensitivity analysis of the association of UPF consumption with incidence of COPD.

|                                                                                                                                         | UPF consumption |                    |                    |                    |                    | Per SD increase    | P-trend |
|-----------------------------------------------------------------------------------------------------------------------------------------|-----------------|--------------------|--------------------|--------------------|--------------------|--------------------|---------|
|                                                                                                                                         | Q1              | Q2                 | Q3                 | Q4                 | Q5                 |                    |         |
| <b><i>The association between absolute UPF consumption (grams per day) and the risk of COPD</i></b>                                     |                 |                    |                    |                    |                    |                    |         |
| Cases                                                                                                                                   | 844             | 745                | 807                | 941                | 1333               |                    |         |
| Person-years                                                                                                                            | 538193          | 539423             | 539188             | 537538             | 533424             |                    |         |
| Fully adjusted HR                                                                                                                       | Reference       | 0.88 (0.79 - 0.97) | 0.90 (0.81 - 0.99) | 0.99 (0.90 - 1.09) | 1.24 (1.13 - 1.36) | 1.14 (1.10 - 1.17) | <0.0001 |
| <b><i>The association between energy contribution of UPF and the risk of COPD</i></b>                                                   |                 |                    |                    |                    |                    |                    |         |
| Cases                                                                                                                                   | 858             | 843                | 849                | 933                | 1187               |                    |         |
| Person-years                                                                                                                            | 537325          | 538689             | 539076             | 537870             | 534807             |                    |         |
| Fully adjusted HR                                                                                                                       | Reference       | 0.99 (0.90 - 1.09) | 1.01 (0.91 - 1.11) | 1.06 (0.96 - 1.17) | 1.24 (1.13 - 1.36) | 1.09 (1.06 - 1.13) | <0.0001 |
| <b><i>Excluded participants with inappropriate energy intake</i></b>                                                                    |                 |                    |                    |                    |                    |                    |         |
| Cases                                                                                                                                   | 795             | 731                | 829                | 943                | 1287               |                    |         |
| Person-years                                                                                                                            | 533424          | 534148             | 533472             | 533092             | 528863             |                    |         |
| Fully adjusted HR                                                                                                                       | Reference       | 0.92 (0.83 - 1.01) | 0.95 (0.86 - 1.05) | 1.03 (0.94 - 1.14) | 1.23 (1.13 - 1.35) | 1.11 (1.08 - 1.14) | <0.0001 |
| <b><i>Additionally adjusted for baseline health conditions (Diabetes, hypertension, asthma, cardiovascular disease, and cancer)</i></b> |                 |                    |                    |                    |                    |                    |         |
| Cases                                                                                                                                   | 812             | 747                | 844                | 964                | 1303               |                    |         |
| Person-years                                                                                                                            | 538307          | 539132             | 538485             | 538026             | 533815             |                    |         |
| Fully adjusted HR                                                                                                                       | Reference       | 0.92 (0.83 - 1.02) | 0.95 (0.86 - 1.05) | 1.04 (0.95 - 1.14) | 1.23 (1.12 - 1.35) | 1.11 (1.08 - 1.14) | <0.0001 |
| <b><i>Excluded participants who developed COPD within the first 2 years of the follow-up</i></b>                                        |                 |                    |                    |                    |                    |                    |         |
| Cases                                                                                                                                   | 762             | 705                | 804                | 892                | 1222               |                    |         |
| Person-years                                                                                                                            | 538163          | 538879             | 538214             | 538162             | 534047             |                    |         |
| Fully adjusted HR                                                                                                                       | Reference       | 0.92 (0.83 - 1.02) | 0.96 (0.87 - 1.06) | 1.02 (0.92 - 1.12) | 1.22 (1.11 - 1.34) | 1.11 (1.08 - 1.14) | <0.0001 |
| <b><i>Excluded participants who developed COPD within the first 5 years of the follow-up</i></b>                                        |                 |                    |                    |                    |                    |                    |         |
| Cases                                                                                                                                   | 616             | 573                | 662                | 739                | 991                |                    |         |
| Person-years                                                                                                                            | 537433          | 538046             | 537421             | 537512             | 534126             |                    |         |
| Fully adjusted HR                                                                                                                       | Reference       | 0.93 (0.83 - 1.04) | 0.98 (0.87 - 1.09) | 1.04 (0.93 - 1.16) | 1.24 (1.11 - 1.37) | 1.11 (1.07 - 1.14) | <0.0001 |
| <b><i>Excluding cases with missing covariables</i></b>                                                                                  |                 |                    |                    |                    |                    |                    |         |
| Cases                                                                                                                                   | 433             | 423                | 472                | 550                | 638                |                    |         |
| Person-years                                                                                                                            | 390555          | 390620             | 390064             | 389946             | 388348             |                    |         |
| Fully adjusted HR                                                                                                                       | Reference       | 0.94 (0.82 - 1.07) | 0.98 (0.86 - 1.12) | 1.09 (0.96 - 1.24) | 1.18 (1.04 - 1.34) | 1.09 (1.05 - 1.13) | 0.0004  |
| <b><i>Adjusting for waist circumference instead of BMI</i></b>                                                                          |                 |                    |                    |                    |                    |                    |         |

|                   |           |                    |                    |                    |                   |                    |         |
|-------------------|-----------|--------------------|--------------------|--------------------|-------------------|--------------------|---------|
| Cases             | 812       | 747                | 844                | 964                | 1303              |                    |         |
| Person-years      | 538307    | 539132             | 538485             | 538026             | 533815            |                    |         |
| Fully adjusted HR | Reference | 0.92 (0.83 - 1.01) | 0.94 (0.85 - 1.04) | 1.01 (0.92 - 1.12) | 1.19 (1.08 - 1.3) | 1.10 (1.07 - 1.12) | <0.0001 |

Abbreviations: UPF, ultra-processed food; COPD, chronic obstructive pulmonary disease; HR, hazard ratio; SD, standard deviation.

HR was calculated by the Cox model adjusted for age, sex, ethnicity, Townsend deprivation index, education levels, income, BMI, physical activity, total energy intake, healthy diet score, smoking, passive smoking exposure and family history of chronic lung diseases.

HRs (95% CIs) and *P*-values were obtained by using the multivariable Cox regression model.

**Table S6.** Substitution models replacing 50g/day, 100g/day and 200g/day UPF with equivalent amount of UNPF and their effect on COPD risk.

|                                                                               | COPD                  |                 |
|-------------------------------------------------------------------------------|-----------------------|-----------------|
|                                                                               | HR (95% CI)           | <i>P</i> -value |
| Replacing 50g/day of UPF weight in diet for an equivalent proportion of UNPF  | 0.985 (0.982 - 0.988) | <0.0001         |
| Replacing 100g/day of UPF weight in diet for an equivalent proportion of UNPF | 0.970 (0.964 - 0.977) | <0.0001         |
| Replacing 200g/day of UPF weight in diet for an equivalent proportion of UNPF | 0.941 (0.929 - 0.954) | <0.0001         |

Abbreviations: HR, hazard ratio; CI, confidence interval; COPD, chronic obstructive pulmonary disease; UNPF, unprocessed or minimally processed foods; UPF, ultra-processed foods.

The models included ultra-processed foods, unprocessed or minimally processed foods, processed culinary ingredients, processed foods, total energy intake, healthy diet score, age, sex, ethnicity, Townsend deprivation index, education levels, income, BMI, physical activity, smoking status, passive smoking exposure, and family history of chronic lung diseases.

HRs (95% CIs) and *P*-values were obtained by using the multivariable Cox regression model.

**Table S7** Substitution models replacing 5%, 10% and 20% UPF with equivalent amount of UNPF and their effect on COPD risk.

|                                                                          | COPD                     |                 |
|--------------------------------------------------------------------------|--------------------------|-----------------|
|                                                                          | HR (95% CI) <sup>a</sup> | <i>P</i> -value |
| Replacing 5% of UPF energy in diet for an equivalent proportion of UNPF  | 0.973 (0.962 - 0.984)    | <0.0001         |
| Replacing 10% of UPF energy in diet for an equivalent proportion of UNPF | 0.947 (0.926 - 0.968)    | <0.0001         |
| Replacing 20% of UPF energy in diet for an equivalent proportion of UNPF | 0.897 (0.857 - 0.937)    | <0.0001         |

Abbreviations: HR, hazard ratio; CI, confidence interval; COPD, chronic obstructive pulmonary disease; UNPF, unprocessed or minimally processed foods; UPF, ultra-processed foods.

<sup>a</sup> The models included ultra-processed foods, unprocessed or minimally processed foods, processed culinary ingredients, processed foods, total energy intake, healthy diet score, age, sex, ethnicity, Townsend deprivation index, education levels, income, BMI, physical activity, smoking status, passive smoking exposure, and family history of chronic lung diseases.

HRs (95% CIs) and *P*-values were obtained by using the multivariable Cox regression model.

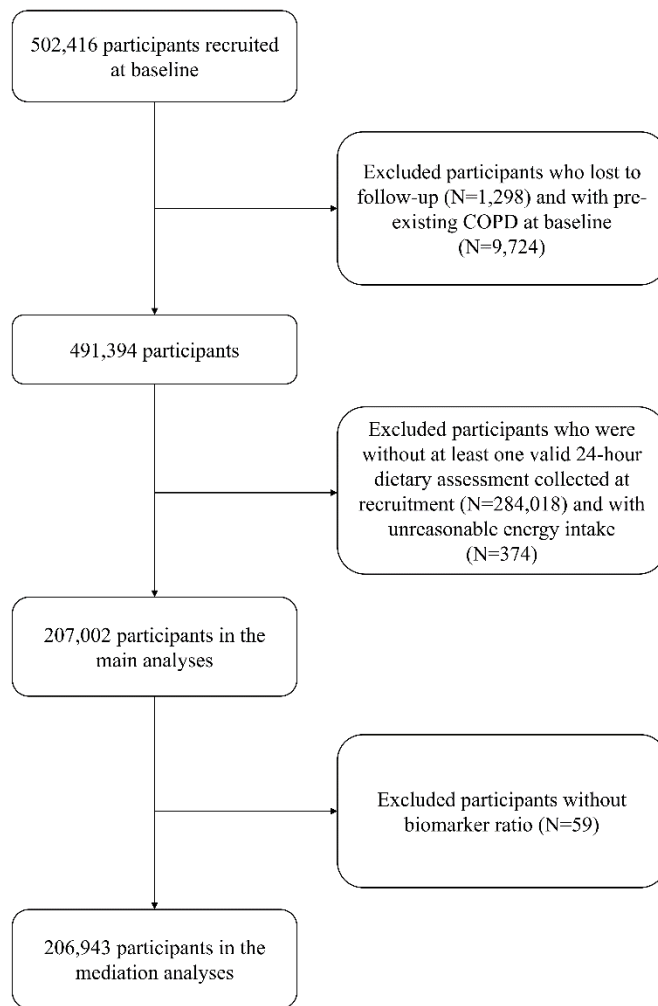

**Figure S1.** Flowchart of the study participants selection in the UK Biobank. Abbreviations: COPD, chronic obstructive pulmonary disease.

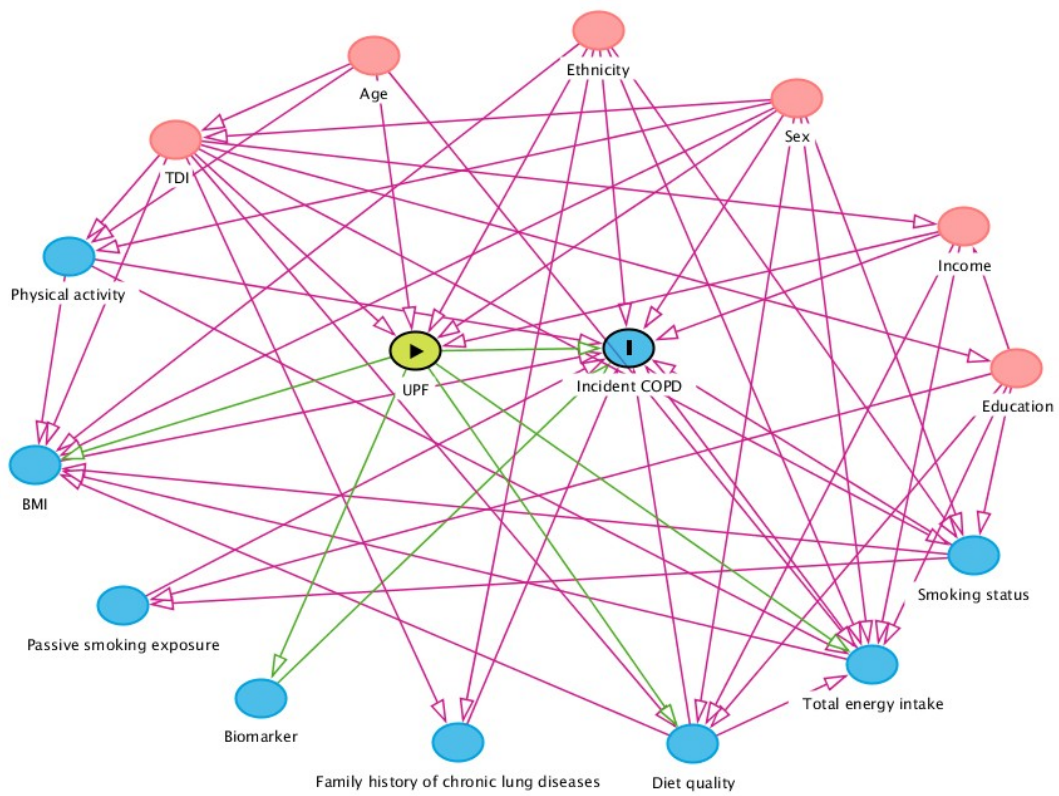

**Figure S2.** Direct acyclic graph of the relation between UPF consumption and COPD. The green circle represents exposure, the blue circle with a rectangle in the middle represents the outcome, and the blue circles represent the confounding variables. Abbreviations: COPD, chronic obstructive pulmonary disease; UPF, ultra-processed foods; BMI, body mass index; TDI, Townsend deprivation index.
